# Supplementary material for: Fast detection of maximal exact matches via fixed sampling of queryK-mers and Bloom filtering of indexK-mers
Source: Oxford University Press journal article supplement (doi:10.1093/bioinformatics/btz273), 2019-04-11
Supplement: bioinformatics_35_22_4560_s7.pdf [file bioinformatics_35_22_4560_s7.pdf]

# Fast detection of maximal exact matches via fixed sampling of query $k$ -mers and Bloom filtering of index $k$ -mers

Yuansheng Liu<sup>1</sup>, Leo Yu Zhang<sup>2</sup>, and Jinyan Li<sup>1</sup>

<sup>1</sup>Advanced Analytics Institute, University of Technology Sydney, PO Box 123, Broadway, NSW 2007, Australia

<sup>2</sup>School of Information Technology, Deakin University, Victoria 3216, Australia

March 31, 2019

Table S1: Details of genome datasets used in the experiments

| Dataset           | No. of sequences | URL                                                                                                                                                                                                                                                                   |
|-------------------|------------------|-----------------------------------------------------------------------------------------------------------------------------------------------------------------------------------------------------------------------------------------------------------------------|
| Homo sapiens      | 93               | <a href="ftp://hgdownload.cse.ucsc.edu/goldenPath/hg19/bigZips/chromFa.tar.gz">ftp://hgdownload.cse.ucsc.edu/goldenPath/hg19/bigZips/chromFa.tar.gz</a>                                                                                                               |
| Mus musculus      | 66               | <a href="ftp://hgdownload.cse.ucsc.edu/goldenPath/mm10/bigZips/chromFa.tar.gz">ftp://hgdownload.cse.ucsc.edu/goldenPath/mm10/bigZips/chromFa.tar.gz</a>                                                                                                               |
| Pan troglodytes   | 24,132           | <a href="ftp://hgdownload.cse.ucsc.edu/goldenPath/panTro3/bigZips/panTro3.fa.gz">ftp://hgdownload.cse.ucsc.edu/goldenPath/panTro3/bigZips/panTro3.fa.gz</a>                                                                                                           |
| Triticum aestivum | 731,921          | <a href="ftp://ftp.ensemblgenomes.org/pub/plants/release-22/fasta/triticum_aestivum/dna/Triticum_aestivum.IWGSP1.22.dna.genome.fa.gz">ftp://ftp.ensemblgenomes.org/pub/plants/release-22/fasta/triticum_aestivum/dna/Triticum_aestivum.IWGSP1.22.dna.genome.fa.gz</a> |
| Triticum durum    | 5,671,204        | <a href="https://urgi.versailles.inra.fr/download/iwgsc/TGAC_WGS_assemblies_of_other_wheat_speciesTGAC_WGS_durum_v1.fasta.gz">https://urgi.versailles.inra.fr/download/iwgsc/TGAC_WGS_assemblies_of_other_wheat_speciesTGAC_WGS_durum_v1.fasta.gz</a>                 |

Table S2: Three pairs of reference and query genomes along with their number of sequences used in the experiments

| Reference genome            | Query genome               |
|-----------------------------|----------------------------|
| Homo sapiens (93)           | Mus musculus (66)          |
| Homo sapiens (93)           | Pan troglodytes (24,132)   |
| Triticum aestivum (731,921) | Triticum durum (5,671,204) |

Table S3: Number of  $k$ -mers on sampling and indexing stages of bfMEM

| Methods                               | H. sapiens vs M. musculus |             |            |            | T. aestivum vs T. durum |             |            |            |
|---------------------------------------|---------------------------|-------------|------------|------------|-------------------------|-------------|------------|------------|
|                                       | $L = 40$                  | $L = 50$    | $L = 80$   | $L = 100$  | $L = 40$                | $L = 50$    | $L = 80$   | $L = 100$  |
| Number of sampled $k$ -mers           | 294,751,204               | 241,159,540 | 91,473,837 | 64,700,785 | 310,246,823             | 247,157,111 | 88,480,971 | 60,185,537 |
| Cardinality of sampled $k$ -mers set  | 260,682,668               | 218,899,183 | 86,099,573 | 61,678,211 | 296,539,245             | 239,430,641 | 82,779,191 | 54,685,008 |
| Number of filtered $k$ -mers          | 20,925,278                | 19,001,992  | 20,196,055 | 21,007,666 | 513,266,575             | 198,611,456 | 50,524,801 | 32,473,459 |
| Cardinality of filtered $k$ -mers set | 13,798,228                | 15,559,803  | 18,540,613 | 19,797,603 | 127,097,761             | 93,678,754  | 38,276,573 | 27,626,651 |

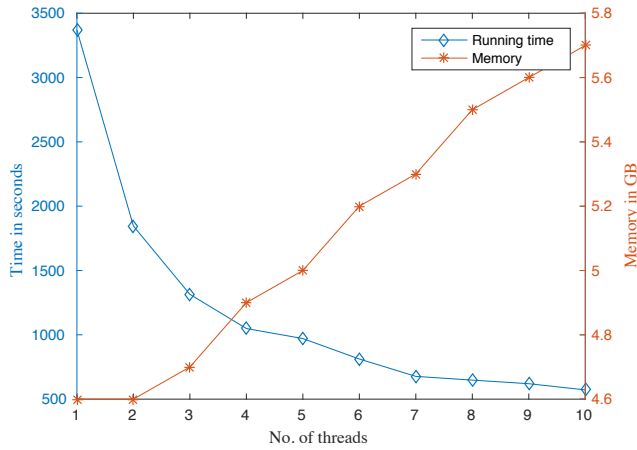

(a)  $L = 50$

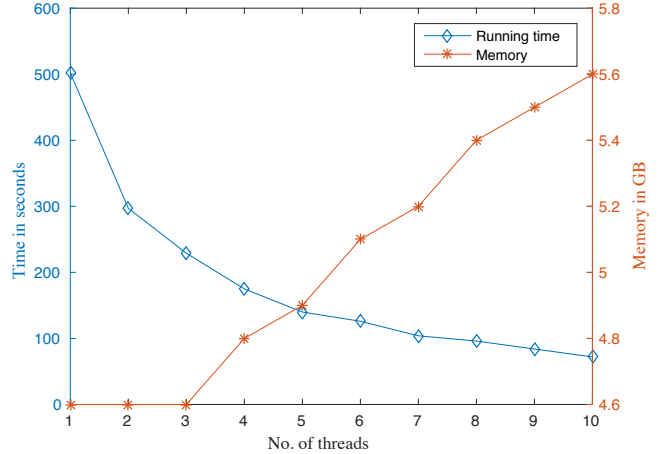

(b)  $L = 80$

Figure S1: Effect of increasing number of threads on running time and memory.

# 1 Result comparison

As we hash matches into some small files and sort them independently to remove duplicates, the order of matches is different from E-MEM and copMEM. For the convenience of the result comparison, we provide a tool “formatconvert” to reorder the MEMs generated by our tool bfMEM. After reordering, the order is the same as that of E-MEM and copMEM. The usages are added in the GitHub page <https://github.com/yuansliu/bfMEM>. Table S4 lists the running time and memory usage of the tool “formatconvert”. It can be seen from the table that the reorder procedure is time- and memory-consuming when large number of MEMs are detected.

Table S4: Running time (in second) and memory usage (in GB) of the tool “formatconvert”

| Format convert | <i>H. sapiens</i> vs <i>M. musculus</i> |          |             | <i>H. sapiens</i> vs <i>P. troglodytes</i> |          |          |           |              | <i>T. aestivum</i> vs <i>T. durum</i> |          |             |
|----------------|-----------------------------------------|----------|-------------|--------------------------------------------|----------|----------|-----------|--------------|---------------------------------------|----------|-------------|
|                | $L = 40$                                | $L = 50$ | $L \geq 80$ | $L = 40$                                   | $L = 50$ | $L = 80$ | $L = 100$ | $L \geq 150$ | $L = 40$                              | $L = 50$ | $L \geq 80$ |
| Time           | 6,824                                   | 599      | < 3         | 7,703                                      | 1,989    | 208      | 82        | < 10         | 143                                   | 27       | < 4         |
| Memory         | 73.5                                    | 7.1      | < 0.1       | 102.5                                      | 22.5     | 3.0      | 1.2       | < 0.2        | 0.03                                  | 0.02     | < 0.02      |

# 2 False positive probability of two Bloom filters

In our method, we first assume the false positive probability (FPP)  $p = 0.01$  and then calculate the bits length  $s$  by cooperating with the number of sampled  $k$ -mers and the number of hash functions  $h = -\log_2 0.01 = 6$ . As we mentioned in Sec. 2.1.1 that some sampled  $k$ -mers on the query sequence are duplicated. The number of sampled  $k$ -mers and the cardinality of sampled  $k$ -mers set are shown in rows 1 and 2 in Tab. S3. We can see that the number of  $k$ -mers inserted into the Bloom filter  $f_q$  is little smaller than the number of sampled  $k$ -mers actually. And the bit array length of  $f_q$  is calculated by the number of sampled  $k$ -mers. Therefore, the FPP of  $f_q$  is little smaller than 0.01, i.e.,

$$\left(1 - e^{-\frac{6 \times u'}{s}}\right)^6 < \left(1 - e^{-\frac{6 \times u}{s}}\right)^6 \approx 0.01,$$

where  $u'$  is the cardinality of sampled  $k$ -mers set and  $u' < u$ .

In the second Bloom filter  $f_r$ , we set the same bit array length of  $f_q$ . The FPP of  $f_r$  is determined by the cardinality of filtered  $k$ -mers set. The number of filtered  $k$ -mers and the cardinality of associated  $k$ -mers set are shown in rows 3 and 4 in Tab. S3. We can see from the Tab. S3, the cardinality of filtered  $k$ -mers set is at least 2 times smaller than the number of sampled  $k$ -mers. Therefore, the FPP of  $f_r$  is:

$$\left(1 - e^{-\frac{6 \times u'/2}{s}}\right)^6 < \left(1 - \left(1 - 0.01^{1/6}\right)^{1/2}\right)^6 = 0.00037.$$

# 3 The effect of Bloom filter FPP

Table S5 presents the performance comparison of bfMEM under different FPP of Bloom filter in the discovery of MEMs between *H. sapiens* vs *M. musculus* with  $L = 80$  and 100. We can see from the results, higher FPP normally leads to more memory consumption as more  $k$ -mers from the reference sequence passing the Bloom filter test which are then added into the hash table for extension. Moreover, higher FPP ( $\geq 0.03$ ) slows down the running time much. On the other hand, when small values of FPP ( $\leq 0.01$ ) are used, the running time and memory usage will fluctuate around their mean value. In our algorithm, we set FPP = 0.01 as default.

Table S5: Comparison of running time (in second) and memory usage (in GB) under different FPP of Bloom filter (*H. sapiens* vs *M. musculus* with  $L = 80$  and 100)

| FPP       |              | 0.003 | 0.005 | 0.007 | 0.009 | 0.01 | 0.015 | 0.02 | 0.025 | 0.03 | 0.05 | 0.10 |
|-----------|--------------|-------|-------|-------|-------|------|-------|------|-------|------|------|------|
| $L = 80$  | Running time | 82    | 83    | 87    | 80    | 81   | 85    | 84   | 92    | 103  | 106  | 123  |
|           | Memory usage | 5.3   | 5.3   | 5.5   | 5.6   | 5.6  | 5.9   | 6.2  | 6.5   | 7.0  | 9.2  | 16.5 |
| $L = 100$ | Running time | 64    | 69    | 67    | 63    | 70   | 71    | 78   | 89    | 87   | 102  | 113  |
|           | Memory usage | 5.2   | 5.3   | 5.4   | 5.6   | 5.6  | 6.0   | 6.2  | 6.6   | 7.2  | 9.6  | 17.0 |

## 4 Other features of bfMEM

Our tool bfMEM also supports to detecting reverse-complement matches or both forward and reverse-complement matches by setting the parameter ‘-s’:

```
./bfmem -l <n> -r <ref> -q <query> -o <output> -s r
./bfmem -l <n> -r <ref> -q <query> -o <output> -s b
```

## 5 Selection of $k$

Given values of  $L$  and  $k$ , the sampling step is  $w = L - k + 1$  and the number of querying  $k$ -mer is  $u = \lceil (m - k + 1)/w \rceil$ , where  $m$  is the length of query sequence. We can see that if  $k$  is set to small, less number of querying  $k$ -mers are sampled. However, if  $k$  is too small, such as  $1 \leq k \leq 20$ , large number of duplicate  $k$ -mers on the reference sequence will pass the Bloom filter test. It leads to more  $k$ -mers to be stored in the hash table. If  $k$  is too large, such as  $k = L$  or  $L - 1$ , large number of querying  $k$ -mers are generated. The value of  $k$  affects the memory usage and running speed. In our implementation, we set some default values according to different values of  $L$  as following:

$$k = \begin{cases} 200; \text{if } L \geq 300. \\ 160; \text{if } L \geq 200; \\ 100; \text{if } L \geq 150; \\ 60; \text{if } L \geq 100; \\ 52; \text{if } L \geq 80; \\ 40; \text{if } L \geq 50; \\ 32; \text{if } L \geq 40; \\ 28; \text{if } L \geq 34; \end{cases}$$

## 6 Exact command used in experiment

- **bfMEM**  
./bfmem -l <n> -r <ref> -q <query> -o <output> -t <threads>
- **essaMEM**  
./essaMEM -maxmatch -l <n> -F -n -threads 10 -k 10 <ref> <query>
- **E-MEM**  
./e-mem -n -l <n> -F -t <threads> <ref> <query>
- **copMEM**  
./copmem -l <n> -o <output> <ref> <query>

Here, we give part of details on the two genomes “hg19.all.fa” and “mus.all.fa”. For others, we only need to change the number of threads and the input genome files.

- **bfMEM**  
./bfmem -l 300 -r hg19.all.fa -q mus.all.fa -o bfmem-300-out -t 10  
./bfmem -l 200 -r hg19.all.fa -q mus.all.fa -o bfmem-200-out -t 10  
./bfmem -l 150 -r hg19.all.fa -q mus.all.fa -o bfmem-150-out -t 10  
./bfmem -l 100 -r hg19.all.fa -q mus.all.fa -o bfmem-100-out -t 10  
./bfmem -l 80 -r hg19.all.fa -q mus.all.fa -o bfmem-80-out -t 10  
./bfmem -l 50 -r hg19.all.fa -q mus.all.fa -o bfmem-50-out -t 10  
./bfmem -l 40 -r hg19.all.fa -q mus.all.fa -o bfmem-40-out -t 10
- **essaMEM**  
./essaMEM -maxmatch -l 300 -F -n -qthreads 10 -k 10 hg19.all.fa mus.all.fa > essamem-300-out  
./essaMEM -maxmatch -l 200 -F -n -qthreads 10 -k 10 hg19.all.fa mus.all.fa > essamem-200-out  
./essaMEM -maxmatch -l 150 -F -n -qthreads 10 -k 10 hg19.all.fa mus.all.fa > essamem-150-out  
./essaMEM -maxmatch -l 100 -F -n -qthreads 10 -k 10 hg19.all.fa mus.all.fa > essamem-100-out  
./essaMEM -maxmatch -l 80 -F -n -qthreads 10 -k 10 hg19.all.fa mus.all.fa > essamem-80-out  
./essaMEM -maxmatch -l 50 -F -n -qthreads 10 -k 10 hg19.all.fa mus.all.fa > essamem-50-out  
./essaMEM -maxmatch -l 40 -F -n -qthreads 10 -k 10 hg19.all.fa mus.all.fa > essamem-40-out

- **E-MEM**

```
./e-mem -n -l 300 -F -t 10 hg19.all.fa mus.all.fa > emem-300-t10-out
./e-mem -n -l 200 -F -t 10 hg19.all.fa mus.all.fa > emem-200-t10-out
./e-mem -n -l 150 -F -t 10 hg19.all.fa mus.all.fa > emem-150-t10-out
./e-mem -n -l 100 -F -t 10 hg19.all.fa mus.all.fa > emem-100-t10-out
./e-mem -n -l 80 -F -t 10 hg19.all.fa mus.all.fa > emem-80-t10-out
./e-mem -n -l 50 -F -t 10 hg19.all.fa mus.all.fa > emem-50-t10-out
./e-mem -n -l 40 -F -t 10 hg19.all.fa mus.all.fa > emem-400-t10-out
```

- **copMEM**

```
./copmem -o copmem-300-out -l 300 hg19.all.fa mus.all.fa
./copmem -o copmem-200-out -l 200 hg19.all.fa mus.all.fa
./copmem -o copmem-150-out -l 150 hg19.all.fa mus.all.fa
./copmem -o copmem-100-out -l 100 hg19.all.fa mus.all.fa
./copmem -o copmem-80-out -l 80 hg19.all.fa mus.all.fa
./copmem -o copmem-50-out -l 50 hg19.all.fa mus.all.fa
```
